# Supplementary material
Source: PubMed Central journal article supplement (PMC4415612)
Supplement: NIHMS681436-supplement-Supplemental_Tables_1-5.pdf [file NIHMS681436-supplement-Supplemental_Tables_1-5.pdf]

**Mutations in *CENPE* define a novel kinetochore-centromeric mechanism for Microcephalic Primordial Dwarfism in humans.**

**Ghayda M. Mirzaa<sup>1</sup>, Benjamin Vitre<sup>2</sup>, Gillian Carpenter<sup>3</sup>, Iga Abramowicz<sup>3</sup>, Joseph G. Gleeson<sup>4</sup>, Alex R. Paciorkowski<sup>5</sup>, Don W. Cleveland<sup>2</sup>, William B. Dobyns<sup>1</sup>, Mark O'Driscoll<sup>3\*</sup>**

**<sup>1</sup> Division of Genetic Medicine, Department of Pediatrics, University of Washington and Center for Integrative Brain Research, Seattle Children's Research Institute, Seattle, WA, USA.**

**<sup>2</sup> Ludwig Institute for Cancer Research, Department of Cellular and Molecular Medicine, University of California, San Diego, La Jolla, CA, USA.**

**<sup>3</sup>Human DNA Damage Response Disorders Group, Genome Damage & Stability Centre, University of Sussex, Falmer, Brighton, BN1 9RQ, United Kingdom.**

**<sup>4</sup> Department of Neurosciences and Pediatrics, University of California, San Diego, La Jolla, CA, USA.**

**<sup>5</sup> Departments of Neurology, Pediatrics & Biomedical Genetics, Center for Neural Development & Disease, University of Rochester Medical Center, Rochester, NY, USA.**

**\*Correspondance: [m.o-driscoll@sussex.ac.uk](mailto:m.o-driscoll@sussex.ac.uk).**

**Ph. 0044(0)1273 678 515**

**Fax. 0044(0)1273 678 121**

## Online Resource Tables.

| Sample Designation | Phenotype                | Workup                                                          |
|--------------------|--------------------------|-----------------------------------------------------------------|
| <b>MPD-001</b>     | MPD IUGR MSG             | <i>PCNT</i> sequencing                                          |
| <b>MPD-002</b>     | MPD IUGR MSG             | <i>PCNT</i> sequencing                                          |
| <b>MPD-003</b>     | MPD IUGR MIC PMG         | <i>PCNT</i> sequencing.<br>ATR-dependent G2-M checkpoint normal |
| <b>MPD-004</b>     | MPD IUGR MSG             | WES – known MPD genes negative.                                 |
| <b>MPD-005</b>     | MPD IUGR MSG Seckel-like | ATR-dependent G2-M checkpoint normal                            |
| <b>MPD-006</b>     | MPD IUGR MSG             | <i>PCNT, ASPM, CENPJ</i>                                        |
| <b>MPD-007</b>     | MPD IUGR MSG             | WES – known MPD genes negative                                  |
| <b>MPD-008</b>     | MPD IUGR MSG ISS         | –                                                               |
| <b>MPD-009</b>     | MPD IUGR MSG             | Targeted sequencing for all MIC and MPD genes                   |
| <b>MPD-010</b>     | MIC MPD-like             | <i>CENPJ, MCPH1, ASPM, PCNT, STIL</i>                           |

### Supplementary Table 1. MIC MPD cohort screened (negative) for *CENPE* mutations (n=10).

All 49 coding *CENPE* exons were sequenced. ISS, infantile spasms; MIC, microcephaly; MPD, microcephalic-osteodysplastic primordial dwarfism; MSG, microcephaly with simplified gyri; WES, whole exome sequencing.

| Algorithm              | Mutation | Score | Interpretation                                                   |
|------------------------|----------|-------|------------------------------------------------------------------|
| <b>PolyPhen-2</b>      | p.D933N  | 0.055 | <i>Benign</i>                                                    |
|                        | P.K1355E | 0.956 | <b>Possibly damaging</b>                                         |
| <b>SIFT</b>            | p.D933N  | 0.49  | <i>Tolerated</i>                                                 |
|                        | P.K1355E | 0.04  | <b>Damaging</b>                                                  |
| <b>ALIGN-GVGD</b>      | p.D933N  | C15   | <i>Unlikely to impact.</i>                                       |
|                        | P.K1355E | C55   | <b>Very likely to impact.</b>                                    |
| <b>Mutation Taster</b> | p.D933N  | 23    | <b>Protein features <i>might</i> be affected (both variants)</b> |
|                        | P.K1355E | 56    |                                                                  |

**Supplementary Table 2. Bioinformatic analysis of *CENPE* variants.**

PolyPhen: <http://genetics.bwh.harvard.edu/pph2/index.shtml>

SIFT: <http://sift.jcvi.org/>

ALIGN-GVGD pathogenicity prediction: <http://agvgd.iarc.fr/>

*Class C0 (no impact) to Class C65 (most likely to impact).*

Mutation Taster: <http://www.mutationtaster.org/>

*Grantham matrix 0-215.*

|                                                            | <b><i>PCNT</i></b>                                                                                                                                 | <b><i>CENPE</i></b>                                                                                             |
|------------------------------------------------------------|----------------------------------------------------------------------------------------------------------------------------------------------------|-----------------------------------------------------------------------------------------------------------------|
| <b><i>Primary phenotype</i></b>                            | MPD<br>(MOPD type II*)                                                                                                                             | MPD                                                                                                             |
| <b>Common phenotypic features</b>                          | Severe intra-uterine and postnatal growth restriction, MIC, ID, typical facies (prominent nose micrognathia), delayed ossification, abnormal teeth |                                                                                                                 |
| <b>Distinct phenotypic features</b>                        | Skeletal anomalies*<br>High juvenile mortality due to cerebral vessel insults, cardiomyopathy, early onset type 2 diabetes, dislipidemia.          | Severe MIC with simplified gyri (OFC -5 to -9 SD)<br>Congenital restrictive cardiomyopathy ( <i>1 sibling</i> ) |
| <b>Function</b>                                            | Centrosome-structural role?                                                                                                                        | Kinetochores-associated; spindle microtubule capture and attachment                                             |
| <b>Mutations</b>                                           | Recessive<br>(Nonsense, splice site, frameshift, missense)                                                                                         | Recessive<br>(Missense)                                                                                         |
| <b><i>Patient LCL Characteristics</i></b>                  | <b><i>PCNT</i></b>                                                                                                                                 | <b><i>CENPE</i></b>                                                                                             |
| <b>Mitotic spindles</b>                                    | Disorganized, multipolar spindles                                                                                                                  | Disorganized, monopolar and multipolar spindles                                                                 |
| <b>Mitotic segregation</b>                                 | Impaired; elevated levels of bi-nucleated cells (with nuclei of equal size)                                                                        | Impaired, elevated levels of bi-nucleated cells (with 50% nuclei unequal in size)                               |
| <b>Mitotic progression</b>                                 | Delayed                                                                                                                                            | Delayed                                                                                                         |
| <b>ATR-dependent DDR</b>                                   | Defective                                                                                                                                          | Functional                                                                                                      |
| <b>Centromeric accumulation of CENP-E in mitotic cells</b> | Reduced                                                                                                                                            | Reduced                                                                                                         |
| <b>CENPE-dependent BubR1-autophos</b>                      | Impaired following colcemid treatment                                                                                                              | Impaired following colcemid treatment                                                                           |

**Supplementary Table 3. Comparison between the clinical and biochemical characteristics of *CENPE*-related MPD and *PCNT*-related MOPD type II patients.**

\*Skeletal anomalies in MOPD type II include: (small iliac wings, coxa vara, V-shaped distal femoral metaphyses, triangular distal femoral epiphyses, pseudoepiphyses, brachymesophalangy V, metaphyseal flaring of the radius and ulna, relatively short arms). These features often develop in an age-dependent manner. BubR1; kinetochores associated kinase; DDR; DNA damage response.

|               |               |               |               |               |               |
|---------------|---------------|---------------|---------------|---------------|---------------|
| <i>ABCC9</i>  | <i>ACTC</i>   | <i>ACTC1</i>  | <i>ACTN2</i>  | <i>ANKRD1</i> | <i>BAG3</i>   |
| <i>BRAF</i>   | <i>CAV3</i>   | <i>CRYAB</i>  | <i>CSRP3</i>  | <i>DES</i>    | <i>DMD</i>    |
| <i>DSC2</i>   | <i>DSG2</i>   | <i>DSP</i>    | <i>DTNA</i>   | <i>EMD</i>    | <i>FKTN</i>   |
| <i>GATAD1</i> | <i>GLA</i>    | <i>HRAS</i>   | <i>ILK</i>    | <i>JPH2</i>   | <i>JUP</i>    |
| <i>KRAS</i>   | <i>LAMA4</i>  | <i>LAMP2</i>  | <i>LDB3</i>   | <i>ZASP</i>   | <i>LMNA</i>   |
| <i>MAP2K1</i> | <i>MAP2K2</i> | <i>MTND1</i>  | <i>MTND5</i>  | <i>MTND6</i>  | <i>MTTD</i>   |
| <i>MTTG</i>   | <i>MTTH</i>   | <i>MTTI</i>   | <i>MTTK</i>   | <i>MTTL1</i>  | <i>MTTL2</i>  |
| <i>MTTM</i>   | <i>MTTQ</i>   | <i>MTTS1</i>  | <i>MTTS2</i>  | <i>MYBPC3</i> | <i>MYH7</i>   |
| <i>MYL2</i>   | <i>MYL3</i>   | <i>MYLK2</i>  | <i>MYOZ2</i>  | <i>MYPN</i>   | <i>NEBL</i>   |
| <i>NEXN</i>   | <i>NRAS</i>   | <i>PDLIM3</i> | <i>PKP2</i>   | <i>PLN</i>    | <i>PRKAG2</i> |
| <i>PTPN11</i> | <i>RAF1</i>   | <i>RBM20</i>  | <i>RYR2</i>   | <i>SCN5A</i>  | <i>SGCD</i>   |
| <i>SOS1</i>   | <i>TAZ</i>    | <i>TCAP</i>   | <i>TMEM43</i> | <i>TMPO</i>   | <i>TNNC1</i>  |
| <i>TNNI3</i>  | <i>TNNT2</i>  | <i>TPM1</i>   | <i>TTN</i>    | <i>TTR</i>    | <i>VCL</i>    |

**Supplementary Table 4. Cardiomyopathy-associated genes.** A list of the known cardiomyopathy-related genes that were interrogated for variants in the exome sequence of LR05-054a1.

**Supplementary Table 5. A list of the variants identified in the cardiomyopathy-related genes from the exome sequence of LR05-054a1.**

Of the 218 variants identified, all but one are commonly represented in dbSNP. The one exception is the intronic variant chr2:g.179549378G>C in the gene *TTN*, that is most likely not pathogenic.

| <b>Gene</b>  | <b>Chr</b> | <b>Coordinate</b> | <b>rsID</b> | <b>Ref</b> | <b>Subject</b> |
|--------------|------------|-------------------|-------------|------------|----------------|
| <i>ABCC9</i> | 12         | 21958399          | rs829060    | G          | C              |
| <i>ABCC9</i> | 12         | 21970019          | rs2638441   | C          | T              |
| <i>ABCC9</i> | 12         | 22005003          | rs2307024   | T          | G              |
| <i>ABCC9</i> | 12         | 22017422          | rs697250    | A          | G              |
| <i>ABCC9</i> | 12         | 22017486          | rs697251    | C          | G              |
| <i>ABCC9</i> | 12         | 22047151          | rs704216    | G          | T              |
| <i>ABCC9</i> | 12         | 22047174          | rs704217    | C          | T              |
| <i>ABCC9</i> | 12         | 22063115          | rs10770865  | A          | G              |
| <i>ABCC9</i> | 12         | 22063337          | rs4148656   | A          | G              |
| <i>ABCC9</i> | 12         | 22063737          | rs4762719   | G          | T              |
| <i>ABCC9</i> | 12         | 22063749          | rs4762720   | T          | C              |
| <i>ABCC9</i> | 12         | 22063971          | rs4148654   | A          | G              |
| <i>ABCC9</i> | 12         | 22068849          | rs3759236   | G          | T              |
| <i>ABCC9</i> | 12         | 22078838          | rs2277405   | T          | G              |
| <i>ACTN2</i> | 1          | 236849952         | rs138279482 | C          | T              |
| <i>ACTN2</i> | 1          | 236882303         | rs1341864   | T          | C              |
| <i>ACTN2</i> | 1          | 236883421         | rs1341863   | C          | T              |
| <i>ACTN2</i> | 1          | 236899042         | rs2288600   | G          | A              |
| <i>ACTN2</i> | 1          | 236902594         | rs2288601   | C          | G              |
| <i>ACTN2</i> | 1          | 236924506         | rs2282366   | A          | G              |
| <i>BAG3</i>  | 10         | 121435955         | rs196294    | A          | C              |
| <i>BAG3</i>  | 10         | 121436362         | rs196295    | A          | G              |
| <i>BRAF</i>  | 7          | 140449071         | rs3789806   | C          | G              |
| <i>BRAF</i>  | 7          | 140449150         | rs9648696   | T          | C              |
| <i>BRAF</i>  | 7          | 140487202         | rs1267632   | C          | T              |
| <i>DES</i>   | 2          | 220285309         | rs1058261   | C          | T              |
| <i>DES</i>   | 2          | 220286142         | rs1058284   | G          | A              |
| <i>DSG2</i>  | 18         | 29104714          | rs2230234   | A          | G              |
| <i>FKTN</i>  | 9          | 108366734         | rs34787999  | G          | A              |
| <i>FKTN</i>  | 9          | 108380355         | rs17309806  | C          | A              |
| <i>HRAS</i>  | 11         | 534242            | rs12628     | A          | G              |
| <i>ILK</i>   | 11         | 6629665           | rs1043388   | C          | T              |
| <i>ILK</i>   | 11         | 6630833           | rs1043390   | G          | A              |
| <i>JPH2</i>  | 20         | 42747247          | rs3810510   | C          | T              |
| <i>JPH2</i>  | 20         | 42814931          | rs6031442   | T          | C              |
| <i>JPH2</i>  | 20         | 42815190          | rs1883790   | G          | A              |
| <i>JUP</i>   | 17         | 39912145          | rs1126821   | T          | A              |
| <i>JUP</i>   | 17         | 39912581          | rs9890858   | A          | G              |

| Gene          | Chr | Coordinate | rsID        | Ref | Subject |
|---------------|-----|------------|-------------|-----|---------|
| <i>JUP</i>    | 17  | 39913645   | rs7216034   | T   | C       |
| <i>JUP</i>    | 17  | 39914070   | rs8067890   | G   | T       |
| <i>JUP</i>    | 17  | 39923614   | rs12942034  | A   | G       |
| <i>JUP</i>    | 17  | 39925713   | rs41283425  | C   | T       |
| <b>KRAS</b>   | 12  | 25362777   | rs1137282   | A   | G       |
| <i>KRAS</i>   | 12  | 25368462   | rs4362222   | C   | T       |
| <i>KRAS</i>   | 12  | 25378456   | rs76433096  | T   | C       |
| <b>LAMA4</b>  | 6   | 112451367  | rs34752945  | G   | T       |
| <i>LAMA4</i>  | 6   | 112454185  | rs764587    | A   | G       |
| <i>LAMA4</i>  | 6   | 112457390  | rs2032567   | C   | T       |
| <i>LAMA4</i>  | 6   | 112457471  | rs2032568   | G   | A       |
| <i>LAMA4</i>  | 6   | 112493872  | rs1050348   | A   | G       |
| <i>LAMA4</i>  | 6   | 112506375  | rs9374309   | G   | A       |
| <i>LAMA4</i>  | 6   | 112506583  | rs6908219   | G   | T       |
| <i>LAMA4</i>  | 6   | 112508769  | rs9387061   | T   | G       |
| <i>LAMA4</i>  | 6   | 112508770  | rs9400522   | G   | T       |
| <i>LAMA4</i>  | 6   | 112522852  | rs11757455  | G   | A       |
| <i>LAMA4</i>  | 6   | 112537682  | rs78871662  | A   | G       |
| <b>LMNA</b>   | 1   | 156104292  | rs12117552  | G   | A       |
| <b>MYH7</b>   | 14  | 23888617   | rs200234670 | G   | T       |
| <i>MYH7</i>   | 14  | 23894565   | rs139882431 | G   | A       |
| <i>MYH7</i>   | 14  | 23902753   | rs2069540   | G   | A       |
| <b>NEBL</b>   | 10  | 21074724   | rs2296614   | T   | C       |
| <i>NEBL</i>   | 10  | 21104694   | rs4748727   | A   | T       |
| <i>NEBL</i>   | 10  | 21108247   | rs1006362   | C   | T       |
| <i>NEBL</i>   | 10  | 21115332   | rs1409348   | T   | C       |
| <i>NEBL</i>   | 10  | 21120116   | rs10491056  | A   | G       |
| <i>NEBL</i>   | 10  | 21129588   | rs41277368  | T   | C       |
| <i>NEBL</i>   | 10  | 21134282   | rs41277370  | C   | G       |
| <i>NEBL</i>   | 10  | 21139389   | rs4025981   | T   | C       |
| <i>NEBL</i>   | 10  | 21141469   | rs703089    | T   | C       |
| <i>NEBL</i>   | 10  | 21148584   | rs4748729   | C   | A       |
| <i>NEBL</i>   | 10  | 21157492   | rs2296609   | T   | C       |
| <i>NEBL</i>   | 10  | 21176945   | rs703100    | G   | A       |
| <i>NEBL</i>   | 10  | 21185821   | rs788971    | A   | C       |
| <i>NEBL</i>   | 10  | 21399813   | rs3864841   | C   | G       |
| <i>NEBL</i>   | 10  | 21401765   | rs4748749   | T   | C       |
| <i>NEBL</i>   | 10  | 21414892   | rs625223    | C   | G       |
| <i>NEBL</i>   | 10  | 21415006   | rs11591355  | T   | C       |
| <i>NEBL</i>   | 10  | 21461232   | rs35856892  | G   | A       |
| <b>PDLIM3</b> | 4   | 186423637  | rs4635850   | G   | A       |
| <i>PDLIM3</i> | 4   | 186423655  | rs12644280  | G   | A       |
| <i>PDLIM3</i> | 4   | 186423677  | rs10866276  | G   | A       |
| <i>PDLIM3</i> | 4   | 186427841  | rs2306705   | T   | C       |
| <b>RYR2</b>   | 1   | 237617757  | rs3765097   | C   | T       |
| <i>RYR2</i>   | 1   | 237620049  | rs2045955   | T   | C       |
| <i>RYR2</i>   | 1   | 237711797  | rs2253273   | A   | G       |
| <i>RYR2</i>   | 1   | 237730124  | rs2805390   | A   | G       |

| Gene                | Chr | Coordinate | rsID        | Ref | Subject |
|---------------------|-----|------------|-------------|-----|---------|
| <i>RYR2</i>         | 1   | 237730169  | rs2779401   | C   | T       |
| <i>RYR2</i>         | 1   | 237753364  | rs2805409   | A   | C       |
| <i>RYR2</i>         | 1   | 237753390  | rs2805410   | A   | G       |
| <i>RYR2</i>         | 1   | 237796837  | rs10802626  | G   | A       |
| <i>RYR2</i>         | 1   | 237797082  | rs1967579   | T   | G       |
| <i>RYR2</i>         | 1   | 237801770  | rs707189    | T   | C       |
| <i>RYR2</i>         | 1   | 237813126  | rs625006    | A   | G       |
| <i>RYR2</i>         | 1   | 237814783  | rs684923    | C   | T       |
| <i>RYR2</i>         | 1   | 237881770  | rs2797441   | C   | T       |
| <i>RYR2</i>         | 1   | 237890437  | rs2685301   | C   | T       |
| <i>RYR2</i>         | 1   | 237923053  | rs2253831   | C   | T       |
| <i>RYR2</i>         | 1   | 237946964  | rs790889    | T   | C       |
| <i>RYR2</i>         | 1   | 237951451  | rs2256242   | A   | G       |
| <i>RYR2</i>         | 1   | 237955680  | rs146659498 | T   | C       |
| <i>RYR2</i>         | 1   | 237955684  | rs78394746  | T   | C       |
| <i>RYR2</i>         | 1   | 237957146  | rs790902    | G   | A       |
| <i>RYR2</i>         | 1   | 237957161  | rs790901    | A   | G       |
| <i>RYR2</i>         | 1   | 237957309  | rs790900    | A   | C       |
| <i>RYR2</i>         | 1   | 237965043  | rs2790347   | A   | G       |
| <i>RYR2</i>         | 1   | 237965094  | rs2794820   | G   | T       |
| <i>RYR2</i>         | 1   | 237965131  | rs9428384   | G   | A       |
| <i>RYR2</i>         | 1   | 237969638  | rs790879    | A   | G       |
| <b><i>SCN5A</i></b> | 3   | 38592406   | rs1805126   | A   | G       |
| <i>SCN5A</i>        | 3   | 38598669   | rs41312393  | A   | G       |
| <i>SCN5A</i>        | 3   | 38622467   | rs7430407   | T   | C       |
| <i>SCN5A</i>        | 3   | 38645420   | rs1805124   | T   | C       |
| <i>SCN5A</i>        | 3   | 38646423   | rs7428779   | C   | T       |
| <i>SCN5A</i>        | 3   | 38674712   | rs6599230   | T   | C       |
| <b><i>SGCD</i></b>  | 5   | 155756414  | rs11740347  | G   | A       |
| <i>SGCD</i>         | 5   | 155771579  | rs1801193   | T   | C       |
| <i>SGCD</i>         | 5   | 155771773  | rs4434364   | A   | G       |
| <i>SGCD</i>         | 5   | 155885469  | rs11954391  | T   | C       |
| <b><i>TCAP</i></b>  | 17  | 37822311   | rs1053651   | A   | C       |
| <b><i>TNNT2</i></b> | 1   | 201331554  | rs1104859   | T   | G       |
| <i>TNNT2</i>        | 1   | 201331664  | rs2365652   | C   | A       |
| <i>TNNT2</i>        | 1   | 201334382  | rs3729547   | G   | A       |
| <i>TNNT2</i>        | 1   | 201335899  | rs1573230   | C   | T       |
| <i>TNNT2</i>        | 1   | 201337170  | rs3729842   | A   | G       |
| <i>TNNT2</i>        | 1   | 201338896  | rs10920184  | T   | C       |
| <i>TNNT2</i>        | 1   | 201339043  | rs12049476  | C   | T       |
| <i>TNNT2</i>        | 1   | 201341341  | rs868407    | C   | T       |
| <b><i>TPM1</i></b>  | 15  | 63349096   | rs4775613   | G   | A       |
| <i>TPM1</i>         | 15  | 63351687   | rs4775614   | A   | G       |
| <i>TPM1</i>         | 15  | 63351840   | rs1071646   | C   | A       |
| <b><i>TTN</i></b>   | 2   | 179392080  | rs16866373  | A   | T       |
| <i>TTN</i>          | 2   | 179395958  | rs3813250   | T   | C       |
| <i>TTN</i>          | 2   | 179396354  | rs3829748   | G   | A       |
| <i>TTN</i>          | 2   | 179397561  | rs3829747   | C   | T       |



| Gene       | Chr | Coordinate | rsID        | Ref | Subject |
|------------|-----|------------|-------------|-----|---------|
| <i>TTN</i> | 2   | 179398823  | rs2857265   | G   | A       |
| <i>TTN</i> | 2   | 179403593  | rs2303539   | G   | A       |
| <i>TTN</i> | 2   | 179404786  | rs2288325   | A   | T       |
| <i>TTN</i> | 2   | 179406191  | rs3731749   | C   | T       |
| <i>TTN</i> | 2   | 179411665  | rs2288327   | A   | G       |
| <i>TTN</i> | 2   | 179412966  | rs35445420  | G   | A       |
| <i>TTN</i> | 2   | 179413110  | rs3731748   | G   | A       |
| <i>TTN</i> | 2   | 179414633  | rs890578    | C   | A       |
| <i>TTN</i> | 2   | 179421694  | rs9808377   | A   | G       |
| <i>TTN</i> | 2   | 179427186  | rs2366751   | A   | G       |
| <i>TTN</i> | 2   | 179427536  | rs3829746   | T   | C       |
| <i>TTN</i> | 2   | 179430997  | rs3731746   | G   | A       |
| <i>TTN</i> | 2   | 179436020  | rs744426    | G   | A       |
| <i>TTN</i> | 2   | 179444137  | rs2288571   | A   | G       |
| <i>TTN</i> | 2   | 179444768  | rs4145333   | C   | G       |
| <i>TTN</i> | 2   | 179444939  | rs2303838   | C   | T       |
| <i>TTN</i> | 2   | 179447848  | rs4894029   | T   | C       |
| <i>TTN</i> | 2   | 179448911  | rs16866400  | G   | A       |
| <i>TTN</i> | 2   | 179451420  | rs2042996   | G   | A       |
| <i>TTN</i> | 2   | 179454394  | rs1560221   | A   | G       |
| <i>TTN</i> | 2   | 179455207  | rs2163009   | T   | C       |
| <i>TTN</i> | 2   | 179457147  | rs16866406  | G   | A       |
| <i>TTN</i> | 2   | 179458591  | rs2288569   | C   | T       |
| <i>TTN</i> | 2   | 179464527  | rs1001238   | T   | C       |
| <i>TTN</i> | 2   | 179514433  | rs2562845   | T   | C       |
| <i>TTN</i> | 2   | 179523590  | rs146110527 | C   | A       |
| <i>TTN</i> | 2   | 179539903  | rs2472751   | C   | A       |
| <i>TTN</i> | 2   | 179542674  | rs72650048  | C   | T       |
| <i>TTN</i> | 2   | 179543217  | rs35112591  | C   | T       |
| <i>TTN</i> | 2   | 179549378  |             | G   | C       |
| <i>TTN</i> | 2   | 179558366  | rs2042995   | T   | C       |
| <i>TTN</i> | 2   | 179576596  | rs2742331   | A   | T       |
| <i>TTN</i> | 2   | 179578730  | rs2562839   | G   | A       |
| <i>TTN</i> | 2   | 179579093  | rs12693164  | T   | C       |
| <i>TTN</i> | 2   | 179579212  | rs2562838   | T   | C       |
| <i>TTN</i> | 2   | 179579822  | rs2562836   | T   | A       |
| <i>TTN</i> | 2   | 179580093  | rs12622914  | A   | C       |
| <i>TTN</i> | 2   | 179582162  | rs62178977  | C   | T       |
| <i>TTN</i> | 2   | 179582327  | rs13390491  | C   | T       |
| <i>TTN</i> | 2   | 179582537  | rs2627043   | G   | T       |
| <i>TTN</i> | 2   | 179582605  | rs6750145   | A   | G       |
| <i>TTN</i> | 2   | 179582853  | rs72648982  | T   | C       |
| <i>TTN</i> | 2   | 179583398  | rs62178978  | T   | C       |
| <i>TTN</i> | 2   | 179583496  | rs16866465  | T   | G       |
| <i>TTN</i> | 2   | 179585266  | rs2562831   | C   | T       |
| <i>TTN</i> | 2   | 179585393  | rs2562830   | A   | G       |
| <i>TTN</i> | 2   | 179587130  | rs12693166  | C   | G       |
| <i>TTN</i> | 2   | 179587687  | rs2742327   | T   | C       |

| Gene       | Chr | Coordinate | rsID        | Ref | Subject |
|------------|-----|------------|-------------|-----|---------|
| <i>TTN</i> | 2   | 179591708  | rs114742263 | C   | T       |
| <i>TTN</i> | 2   | 179595117  | rs17076     | C   | G       |
| <i>TTN</i> | 2   | 179598228  | rs12993099  | A   | G       |
| <i>TTN</i> | 2   | 179600563  | rs2742348   | G   | A       |
| <i>TTN</i> | 2   | 179605180  | rs746578    | C   | T       |
| <i>TTN</i> | 2   | 179614952  | rs10803917  | A   | G       |
| <i>TTN</i> | 2   | 179615887  | rs922984    | T   | C       |
| <i>TTN</i> | 2   | 179615931  | rs922985    | C   | G       |
| <i>TTN</i> | 2   | 179615994  | rs922986    | T   | C       |
| <i>TTN</i> | 2   | 179620951  | rs7585334   | C   | T       |
| <i>TTN</i> | 2   | 179621477  | rs6433728   | C   | T       |
| <i>TTN</i> | 2   | 179623758  | rs2291310   | C   | T       |
| <i>TTN</i> | 2   | 179623939  | rs6705594   | T   | C       |
| <i>TTN</i> | 2   | 179629363  | rs4894043   | T   | C       |
| <i>TTN</i> | 2   | 179629461  | rs2291311   | C   | T       |
| <i>TTN</i> | 2   | 179632710  | rs2291313   | T   | C       |
| <i>TTN</i> | 2   | 179633298  | rs4471922   | G   | T       |
| <i>TTN</i> | 2   | 179634392  | rs13388274  | A   | T       |
| <i>TTN</i> | 2   | 179634421  | rs200875815 | T   | G       |
| <i>TTN</i> | 2   | 179634961  | rs33917087  | C   | A       |
| <i>TTN</i> | 2   | 179635919  | rs13011633  | C   | T       |
| <i>TTN</i> | 2   | 179642425  | rs719201    | G   | A       |
| <i>TTN</i> | 2   | 179643886  | rs2291302   | A   | G       |
| <i>TTN</i> | 2   | 179643934  | rs2291301   | A   | G       |
| <i>TTN</i> | 2   | 179644035  | rs1552280   | G   | A       |
| <i>TTN</i> | 2   | 179644855  | rs10497520  | T   | C       |
| <i>TTN</i> | 2   | 179650408  | rs35813871  | G   | A       |
| <i>TTN</i> | 2   | 179650701  | rs6715406   | C   | T       |
| <i>TTN</i> | 2   | 179667090  | rs3816849   | C   | T       |
| <i>TTR</i> | 18  | 29175210   | rs121918074 | C   | A       |
| <b>VCL</b> | 10  | 75865065   | rs767809    | G   | A       |
| <i>VCL</i> | 10  | 75866929   | rs2131957   | C   | A       |
| <i>VCL</i> | 10  | 75871735   | rs2131956   | C   | G       |
| <i>VCL</i> | 10  | 75873892   | rs10824072  | C   | T       |
| <i>VCL</i> | 10  | 75874192   | rs28639484  | T   | C       |
